# Supplementary material for: Onto2Vec: joint vector-based representation of biological entities and their ontology-based annotations
Source: PubMed Central journal article supplement — Bioinformatics. 2018 Jun 27;34(13):i52–60. doi: 10.1093/bioinformatics/bty259 (PMC6022543; doi:10.1093/bioinformatics/bty259), 2018-06-27
Supplement: bty259_hoehndorf.30.sup.1.pdf [file bty259_hoehndorf.30.sup.1.pdf]

## Supplementary Materials for

# Onto2Vec: joint vector-based representation of biological entities and their ontology-based annotations

Fatima Zohra Smaili <sup>1</sup>, Xin Gao <sup>1,\*</sup> and Robert Hoehndorf <sup>1,\*</sup>

<sup>1</sup>Computer, Electrical and Mathematical Sciences and Engineering Division, Computational Bioscience Research Center, KingAbdullah University of Science and Technology, Thuwal 23955, Saudi Arabia.

\*All correspondence should be addressed to: [Robert.Hoehndorf@kaust.edu.sa](mailto:Robert.Hoehndorf@kaust.edu.sa) and [Xin.Gao@kaust.edu.sa](mailto:Xin.Gao@kaust.edu.sa)

S1.

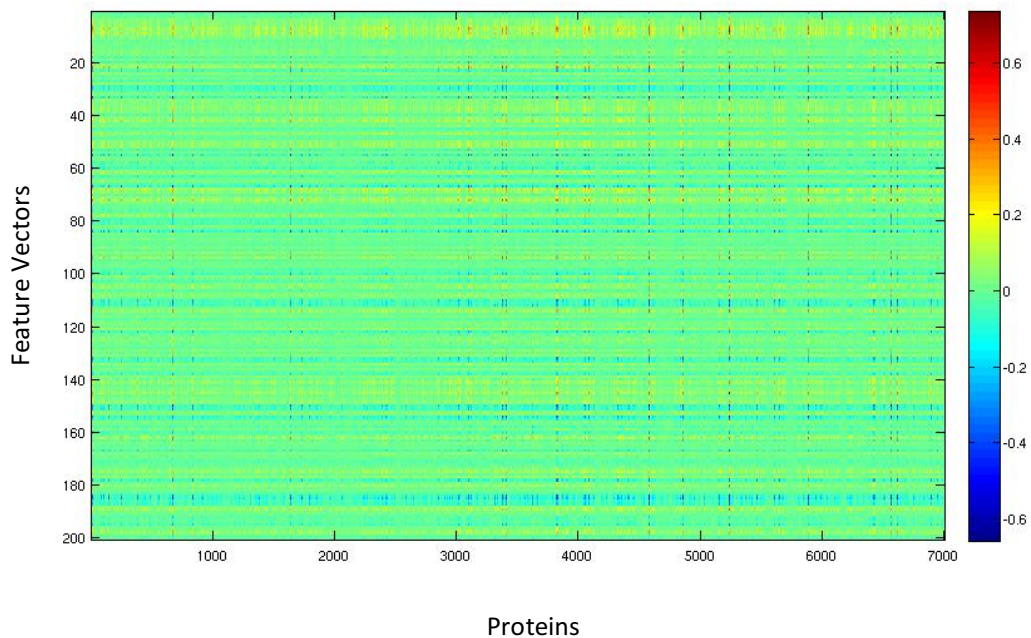

Figure S1. A heatmap illustrating the Onto2Vec vector representations for 7,000 randomly chosen proteins.
